# Supplementary material
Source: PubMed Central journal article supplement (PMC4957583)
Supplement: NIHMS797705-supplement-Supp1.pdf [file NIHMS797705-supplement-Supp1.pdf]

**Speed of Sound Measurements in (Argon + Carbon Dioxide) over the  
Temperature Range from (275 to 500) K at Pressures up to 8 MPa**

**SUPPLEMENTAL DATA**

**Robin Wegge<sup>†</sup>, Mark O. McLinden<sup>‡</sup>, Richard A. Perkins<sup>‡</sup>, Markus Richter<sup>†</sup>,  
and Roland Span<sup>†</sup>**

<sup>†</sup>*Lehrstuhl für Thermodynamik, Ruhr-Universität Bochum, D-44780 Bochum, Germany*

<sup>‡</sup>*Applied Chemicals and Materials Division, National Institute of Standards and Technology,  
325 Broadway, Mailstop 647.07, Boulder, Colorado 80305, United States*

Table S1. Experimental ( $p, c, T, x$ ) data for Ar/CO<sub>2</sub> ( $x_{\text{CO}_2} = 0.50104$ , mole fraction), relative deviations of the experimental data  $c_{\text{exp}}$  from speeds of sound  $c_{\text{EOS}}$  calculated with the EOS-CG equation of state of Gernert and Span [2], and the combined expanded uncertainty  $U_c$  ( $k = 2$ ) of the speed of sound measurements are listed;  $p$  is the pressure and  $T$  is the temperature (ITS-90). The standard uncertainty in temperature was less than 20 mK and the standard uncertainty in pressure was  $(20 \cdot 10^{-6} \cdot p + 0.15 \text{ kPa})$  for  $p < 5 \text{ MPa}$  and  $(20 \cdot 10^{-6} \cdot p + 1.0 \text{ kPa})$  for  $p > 5 \text{ MPa}$ . All experimental values are listed; values written in italics are regarded as outliers.

| $p / \text{MPa}$ | $T / \text{K}$ | $c_{\text{exp}} / \text{m s}^{-1}$ | $100 \left( \frac{c_{\text{exp}} - c_{\text{EOS}}}{c_{\text{EOS}}} \right)$ | $U_c(c) \text{ } c^{-1} / \%$ |
|------------------|----------------|------------------------------------|-----------------------------------------------------------------------------|-------------------------------|
|                  |                | <i>f(1, 1)</i>                     |                                                                             |                               |
| 8.21766          | 275.005        | 253.781                            | -0.6290                                                                     | 0.0547                        |
| 8.21701          | 274.997        | 253.772                            | -0.6297                                                                     | 0.0547                        |
| 8.21659          | 274.998        | 253.766                            | -0.6326                                                                     | 0.0547                        |
| 8.21562          | 274.998        | 253.746                            | -0.6400                                                                     | 0.0547                        |
| 8.21539          | 274.991        | 253.746                            | -0.6376                                                                     | 0.0547                        |
| 8.21533          | 274.994        | 253.746                            | -0.6387                                                                     | 0.0547                        |
| 6.07288          | 274.985        | 257.997                            | -0.1964                                                                     | 0.0494                        |
| 6.07319          | 274.994        | 258.008                            | -0.1945                                                                     | 0.0494                        |
| 6.07324          | 274.987        | 258.010                            | -0.1916                                                                     | 0.0494                        |
| 6.07352          | 274.992        | 258.016                            | -0.1906                                                                     | 0.0494                        |

|          |         |         |         |        |
|----------|---------|---------|---------|--------|
| 6.07362  | 274.996 | 258.021 | -0.1897 | 0.0494 |
| 6.07355  | 274.991 | 258.023 | -0.1872 | 0.0494 |
| 4.02312  | 274.987 | 263.852 | -0.0282 | 0.0455 |
| 4.02325  | 274.994 | 263.855 | -0.0287 | 0.0455 |
| 4.02327  | 274.989 | 263.858 | -0.0263 | 0.0455 |
| 2.00654  | 275.004 | 270.443 | 0.0038  | 0.0429 |
| 2.00650  | 274.998 | 270.444 | 0.0053  | 0.0429 |
| 2.00649  | 275.006 | 270.445 | 0.0040  | 0.0429 |
| 2.00639  | 275.001 | 270.446 | 0.0055  | 0.0429 |
| 2.00637  | 274.999 | 270.442 | 0.0042  | 0.0430 |
| 2.00637  | 275.006 | 270.445 | 0.0039  | 0.0429 |
| 0.102475 | 274.990 | 276.984 | -0.0273 | 0.0453 |
| 0.102491 | 274.986 | 276.927 | -0.0470 | 0.0453 |
| 0.102506 | 274.994 | 276.960 | -0.0363 | 0.0453 |
| 0.102551 | 274.993 | 275.506 | -0.5610 | 0.0453 |
| 0.102560 | 274.989 | 275.442 | -0.5833 | 0.0453 |
| 0.102570 | 274.996 | 275.451 | -0.5812 | 0.0453 |

---

$f(0, 3)$

---

|          |         |         |         |        |
|----------|---------|---------|---------|--------|
| 8.21652  | 275.001 | 254.203 | -0.4620 | 0.0604 |
| 8.21599  | 274.996 | 254.194 | -0.4644 | 0.0547 |
| 8.21568  | 275.001 | 254.177 | -0.4729 | 0.0588 |
| 8.21474  | 274.994 | 254.196 | -0.4629 | 0.0552 |
| 8.21455  | 274.991 | 254.160 | -0.4760 | 0.0907 |
| 8.21458  | 274.998 | 254.165 | -0.4763 | 0.0563 |
| 6.07254  | 274.992 | 257.968 | -0.2099 | 0.0498 |
| 6.07270  | 274.990 | 257.969 | -0.2085 | 0.0497 |
| 6.07278  | 274.987 | 257.970 | -0.2070 | 0.0507 |
| 6.07305  | 274.995 | 257.987 | -0.2030 | 0.0515 |
| 6.07307  | 274.994 | 258.005 | -0.1954 | 0.0532 |
| 6.07301  | 274.989 | 258.018 | -0.1890 | 0.0712 |
| 4.02289  | 274.993 | 263.911 | -0.0074 | 0.0465 |
| 4.02295  | 274.992 | 263.862 | -0.0256 | 0.0488 |
| 4.02296  | 274.987 | 263.906 | -0.0077 | 0.0461 |
| 2.00636  | 274.999 | 270.599 | 0.0625  | 0.0430 |
| 2.00633  | 275.002 | 270.575 | 0.0530  | 0.0523 |
| 2.00632  | 275.007 | 270.699 | 0.0976  | 0.0969 |
| 2.00622  | 274.998 | 270.600 | 0.0629  | 0.0435 |
| 2.00622  | 275.004 | 270.617 | 0.0679  | 0.0471 |
| 2.00621  | 275.004 | 270.575 | 0.0524  | 0.0550 |
| 0.102477 | 274.986 | 289.226 | 4.3923  | 0.5227 |
| 0.102492 | 274.991 | 289.343 | 4.4336  | 0.4540 |
| 0.102506 | 274.994 | 289.733 | 4.5737  | 0.2228 |
| 0.102548 | 274.989 | 290.076 | 4.6985  | 0.2344 |

|          |                       |         |         |        |
|----------|-----------------------|---------|---------|--------|
| 0.102557 | 274.992               | 289.980 | 4.6634  | 0.2480 |
| 0.102567 | 274.997               | 290.035 | 4.6826  | 0.2308 |
|          | <hr/> $f(0, 4)$ <hr/> |         |         |        |
| 8.21645  | 275.000               | 254.174 | -0.4732 | 0.0564 |
| 8.21593  | 274.997               | 254.164 | -0.4761 | 0.0553 |
| 8.21567  | 275.002               | 254.137 | -0.4885 | 0.0574 |
| 8.21469  | 274.993               | 254.178 | -0.4695 | 0.0547 |
| 8.21455  | 274.992               | 254.167 | -0.4732 | 0.0553 |
| 8.21459  | 274.998               | 254.185 | -0.4684 | 0.0566 |
| 6.07258  | 274.993               | 257.952 | -0.2164 | 0.0541 |
| 6.07270  | 274.989               | 257.938 | -0.2205 | 0.0499 |
| 6.07280  | 274.987               | 257.982 | -0.2028 | 0.0495 |
| 6.07309  | 274.996               | 257.963 | -0.2124 | 0.0526 |
| 6.07306  | 274.993               | 257.968 | -0.2097 | 0.0506 |
| 6.07302  | 274.989               | 257.964 | -0.2098 | 0.0522 |
| 4.02289  | 274.994               | 263.925 | -0.0025 | 0.0500 |
| 4.02297  | 274.991               | 263.921 | -0.0030 | 0.0487 |
| 4.02298  | 274.987               | 263.925 | -0.0006 | 0.0506 |
| 2.00635  | 274.998               | 270.610 | 0.0667  | 0.0976 |
| 2.00633  | 275.004               | 270.621 | 0.0697  | 0.0729 |
| 2.00632  | 275.006               | 270.630 | 0.0725  | 0.0454 |
| 2.00622  | 274.998               | 270.657 | 0.0840  | 0.0709 |
| 2.00622  | 275.005               | 270.606 | 0.0637  | 0.0901 |
| 2.00621  | 275.003               | 270.568 | 0.0501  | 0.0435 |
| 0.102478 | 274.985               | 287.882 | 3.9072  | 0.4819 |
| 0.102494 | 274.992               | 287.911 | 3.9164  | 0.5156 |
| 0.102507 | 274.993               | 288.047 | 3.9654  | 0.4619 |
| 0.102550 | 274.989               | 287.424 | 3.7415  | 0.5201 |
| 0.102558 | 274.993               | 287.418 | 3.7384  | 0.5151 |
| 0.102568 | 274.996               | 287.473 | 3.7579  | 0.5055 |
|          | <hr/> $f(1, 1)$ <hr/> |         |         |        |
| 8.16934  | 299.824               | 275.099 | -0.1091 | 0.0538 |
| 8.17003  | 299.841               | 275.105 | -0.1115 | 0.0538 |
| 8.17028  | 299.835               | 275.139 | -0.0975 | 0.0538 |
| 8.17111  | 299.851               | 275.145 | -0.0995 | 0.0538 |
| 8.17107  | 299.845               | 275.150 | -0.0960 | 0.0538 |
| 8.17118  | 299.853               | 275.149 | -0.0987 | 0.0538 |
| 8.17109  | 299.848               | 275.132 | -0.1034 | 0.0538 |
| 8.17109  | 299.852               | 275.140 | -0.1017 | 0.0538 |
| 8.17117  | 299.856               | 275.151 | -0.0984 | 0.0538 |
| 7.65986  | 299.979               | 275.449 | -0.0611 | 0.0525 |
| 7.65952  | 299.971               | 275.449 | -0.0591 | 0.0525 |
| 7.65910  | 299.960               | 275.439 | -0.0600 | 0.0525 |

|          |         |         |         |        |
|----------|---------|---------|---------|--------|
| 7.65876  | 299.952 | 275.439 | -0.0579 | 0.0525 |
| 7.65834  | 299.942 | 275.423 | -0.0611 | 0.0525 |
| 7.65801  | 299.934 | 275.423 | -0.0592 | 0.0525 |
| 6.00768  | 299.945 | 276.809 | -0.0010 | 0.0488 |
| 6.00783  | 299.943 | 276.816 | 0.0020  | 0.0488 |
| 6.00795  | 299.948 | 276.815 | 0.0006  | 0.0488 |
| 6.00802  | 299.947 | 276.825 | 0.0044  | 0.0488 |
| 6.00805  | 299.954 | 276.826 | 0.0031  | 0.0488 |
| 6.00802  | 299.950 | 276.827 | 0.0046  | 0.0488 |
| 4.02072  | 299.943 | 279.769 | 0.0278  | 0.0452 |
| 4.02079  | 299.948 | 279.775 | 0.0289  | 0.0452 |
| 4.02080  | 299.944 | 279.774 | 0.0291  | 0.0452 |
| 1.98693  | 299.941 | 283.784 | -0.0007 | 0.0428 |
| 1.98697  | 299.946 | 283.785 | -0.0011 | 0.0428 |
| 1.98699  | 299.947 | 283.786 | -0.0011 | 0.0428 |
| 0.494298 | 299.948 | 287.204 | -0.0355 | 0.0424 |
| 0.494316 | 299.942 | 287.324 | 0.0073  | 0.0423 |
| 0.494341 | 299.951 | 287.236 | -0.0246 | 0.0424 |
| 0.494391 | 299.947 | 287.321 | 0.0056  | 0.0423 |
| 0.494404 | 299.954 | 287.234 | -0.0260 | 0.0425 |
| 0.494411 | 299.948 | 287.277 | -0.0100 | 0.0424 |

---

$f(0, 3)$

---

|         |         |         |         |        |
|---------|---------|---------|---------|--------|
| 8.16876 | 299.827 | 274.970 | -0.1568 | 0.0567 |
| 8.16940 | 299.840 | 275.017 | -0.1432 | 0.0696 |
| 8.16967 | 299.836 | 275.067 | -0.1237 | 0.0610 |
| 8.17043 | 299.851 | 275.049 | -0.1341 | 0.0539 |
| 8.17042 | 299.845 | 275.043 | -0.1349 | 0.0538 |
| 8.17053 | 299.853 | 275.048 | -0.1351 | 0.0539 |
| 8.17042 | 299.848 | 275.064 | -0.1278 | 0.0603 |
| 8.17043 | 299.853 | 275.019 | -0.1457 | 0.0538 |
| 8.17051 | 299.855 | 275.104 | -0.1153 | 0.0547 |
| 7.65880 | 299.969 | 275.415 | -0.0708 | 0.0536 |
| 7.65836 | 299.958 | 275.415 | -0.0680 | 0.0536 |
| 7.65802 | 299.950 | 275.353 | -0.0883 | 0.0547 |
| 7.65761 | 299.939 | 275.353 | -0.0858 | 0.0547 |
| 7.65729 | 299.931 | 275.363 | -0.0802 | 0.0544 |
| 6.00726 | 299.947 | 276.834 | 0.0075  | 0.0538 |
| 6.00736 | 299.942 | 276.818 | 0.0028  | 0.0490 |
| 6.00751 | 299.950 | 276.818 | 0.0011  | 0.0493 |
| 6.00755 | 299.947 | 276.835 | 0.0079  | 0.0493 |
| 6.00758 | 299.954 | 276.798 | -0.0073 | 0.0562 |
| 6.00756 | 299.949 | 276.823 | 0.0031  | 0.0488 |
| 4.02043 | 299.945 | 279.860 | 0.0599  | 0.0452 |

|          |         |           |         |        |
|----------|---------|-----------|---------|--------|
| 4.02050  | 299.947 | 279.829   | 0.0484  | 0.0451 |
| 4.02053  | 299.945 | 279.825   | 0.0472  | 0.0493 |
| 1.98679  | 299.940 | 283.882   | 0.0339  | 0.0709 |
| 1.98684  | 299.947 | 283.885   | 0.0337  | 0.0737 |
| 1.98684  | 299.946 | 283.879   | 0.0319  | 0.0702 |
| 0.494267 | 299.948 | 291.752   | 1.5478  | 0.0435 |
| 0.494286 | 299.943 | 291.725   | 1.5391  | 0.0452 |
| 0.494310 | 299.952 | 291.731   | 1.5398  | 0.0505 |
| 0.494360 | 299.948 | 291.722   | 1.5373  | 0.0465 |
| 0.494372 | 299.954 | 291.726   | 1.5377  | 0.0470 |
| 0.494378 | 299.947 | 291.723   | 1.5377  | 0.0436 |
|          |         | $f(0, 4)$ |         |        |
| 8.16888  | 299.831 | 275.035   | -0.1342 | 0.0539 |
| 8.16944  | 299.839 | 275.048   | -0.1317 | 0.0792 |
| 8.16973  | 299.837 | 274.955   | -0.1647 | 0.0720 |
| 8.17043  | 299.850 | 275.029   | -0.1413 | 0.0552 |
| 8.17043  | 299.845 | 275.039   | -0.1365 | 0.0539 |
| 8.17054  | 299.853 | 275.034   | -0.1403 | 0.0728 |
| 8.17040  | 299.847 | 275.056   | -0.1308 | 0.0549 |
| 8.17046  | 299.854 | 275.063   | -0.1298 | 0.0557 |
| 8.17050  | 299.854 | 275.051   | -0.1343 | 0.0538 |
| 7.65872  | 299.966 | 275.387   | -0.0801 | 0.0540 |
| 7.65828  | 299.955 | 275.387   | -0.0773 | 0.0540 |
| 7.65795  | 299.947 | 275.361   | -0.0848 | 0.0537 |
| 7.65749  | 299.937 | 275.361   | -0.0822 | 0.0537 |
| 7.65718  | 299.929 | 275.352   | -0.0837 | 0.0546 |
| 6.00730  | 299.948 | 276.824   | 0.0034  | 0.0496 |
| 6.00735  | 299.942 | 276.813   | 0.0013  | 0.0491 |
| 6.00752  | 299.951 | 276.818   | 0.0008  | 0.0488 |
| 6.00757  | 299.947 | 276.822   | 0.0033  | 0.0494 |
| 6.00760  | 299.955 | 276.808   | -0.0036 | 0.0493 |
| 6.00754  | 299.949 | 276.816   | 0.0007  | 0.0494 |
| 4.02045  | 299.946 | 279.822   | 0.0460  | 0.0481 |
| 4.02050  | 299.946 | 279.852   | 0.0567  | 0.0452 |
| 4.02055  | 299.947 | 279.797   | 0.0371  | 0.0607 |
| 1.98679  | 299.939 | 283.888   | 0.0364  | 0.0432 |
| 1.98685  | 299.949 | 283.979   | 0.0665  | 0.0431 |
| 1.98684  | 299.945 | 283.893   | 0.0371  | 0.0662 |
| 0.494270 | 299.947 | 290.654   | 1.1655  | 0.1332 |
| 0.494289 | 299.944 | 290.724   | 1.1906  | 0.0878 |
| 0.494312 | 299.952 | 290.745   | 1.1967  | 0.1003 |
| 0.494361 | 299.949 | 290.362   | 1.0638  | 0.0547 |
| 0.494372 | 299.953 | 290.478   | 1.1036  | 0.1090 |

|                 |                            |                |               |               |
|-----------------|----------------------------|----------------|---------------|---------------|
| <i>0.494378</i> | <i>299.947</i>             | <i>290.144</i> | <i>0.9881</i> | <i>0.2364</i> |
|                 | <hr/> <i>f(1, 1)</i> <hr/> |                |               |               |
| 7.29121         | 350.008                    | 306.189        | 0.0540        | 0.0512        |
| 7.29109         | 350.005                    | 306.183        | 0.0525        | 0.0512        |
| 7.29119         | 350.014                    | 306.212        | 0.0603        | 0.0512        |
| 6.00271         | 350.007                    | 305.929        | 0.0549        | 0.0484        |
| 6.00264         | 350.004                    | 305.937        | 0.0581        | 0.0484        |
| 6.00272         | 350.013                    | 305.948        | 0.0600        | 0.0484        |
| 6.00249         | 350.005                    | 305.939        | 0.0585        | 0.0484        |
| 6.00250         | 350.009                    | 305.944        | 0.0595        | 0.0484        |
| 6.00250         | 350.013                    | 305.946        | 0.0596        | 0.0484        |
| 4.00154         | 350.013                    | 306.294        | 0.0408        | 0.0449        |
| 4.00152         | 350.005                    | 306.293        | 0.0416        | 0.0449        |
| 4.00151         | 350.011                    | 306.301        | 0.0433        | 0.0449        |
| 1.98998         | 350.006                    | 307.461        | 0.0031        | 0.0426        |
| 1.98999         | 350.014                    | 307.457        | 0.0005        | 0.0426        |
| 1.98996         | 350.006                    | 307.452        | -0.0001       | 0.0426        |
| 0.487370        | 350.008                    | 308.883        | -0.0066       | 0.0423        |
| 0.487376        | 350.004                    | 308.886        | -0.0053       | 0.0423        |
| 0.487390        | 350.012                    | 308.867        | -0.0122       | 0.0423        |
| 0.487414        | 350.007                    | 308.865        | -0.0122       | 0.0423        |
| 0.487421        | 350.007                    | 308.852        | -0.0167       | 0.0423        |
| 0.487429        | 350.013                    | 308.879        | -0.0084       | 0.0423        |
|                 | <hr/> <i>f(0, 3)</i> <hr/> |                |               |               |
| 7.29070         | 350.008                    | 306.283        | 0.0848        | 0.0603        |
| 7.29057         | 350.005                    | 306.231        | 0.0683        | 0.0845        |
| <i>7.29067</i>  | <i>350.014</i>             | <i>306.201</i> | <i>0.0570</i> | <i>0.1442</i> |
| 6.00229         | 350.007                    | 305.920        | 0.0519        | 0.0484        |
| 6.00222         | 350.004                    | 305.922        | 0.0530        | 0.0483        |
| 6.00231         | 350.013                    | 305.888        | 0.0406        | 0.0601        |
| 6.00207         | 350.005                    | 305.924        | 0.0534        | 0.0486        |
| 6.00209         | 350.009                    | 305.925        | 0.0535        | 0.0493        |
| 6.00208         | 350.013                    | 305.956        | 0.0629        | 0.0484        |
| 4.00127         | 350.013                    | 306.409        | 0.0782        | 0.0477        |
| 4.00125         | 350.005                    | 306.385        | 0.0717        | 0.0479        |
| 4.00124         | 350.011                    | 306.385        | 0.0708        | 0.0472        |
| 1.98985         | 350.006                    | 307.590        | 0.0450        | 0.0472        |
| 1.98986         | 350.014                    | 307.628        | 0.0560        | 0.0466        |
| 1.98983         | 350.006                    | 307.590        | 0.0448        | 0.0456        |
| <i>0.487340</i> | <i>350.008</i>             | <i>313.530</i> | <i>1.4978</i> | <i>0.1016</i> |
| <i>0.487345</i> | <i>350.004</i>             | <i>313.532</i> | <i>1.4990</i> | <i>0.0577</i> |
| <i>0.487360</i> | <i>350.012</i>             | <i>313.552</i> | <i>1.5044</i> | <i>0.0605</i> |
| <i>0.487384</i> | <i>350.007</i>             | <i>313.543</i> | <i>1.5023</i> | <i>0.0500</i> |

|          |                       |         |         |        |
|----------|-----------------------|---------|---------|--------|
| 0.487390 | 350.007               | 313.534 | 1.4991  | 0.0475 |
| 0.487399 | 350.013               | 313.541 | 1.5005  | 0.0539 |
|          | <hr/> $f(0, 4)$ <hr/> |         |         |        |
| 7.29065  | 350.006               | 306.010 | -0.0043 | 0.1315 |
| 7.29059  | 350.006               | 306.031 | 0.0027  | 0.0743 |
| 7.29068  | 350.014               | 305.948 | -0.0257 | 0.0762 |
| 6.00227  | 350.005               | 305.927 | 0.0546  | 0.0848 |
| 6.00223  | 350.006               | 305.914 | 0.0501  | 0.0737 |
| 6.00230  | 350.013               | 305.920 | 0.0509  | 0.0790 |
| 6.00207  | 350.005               | 306.020 | 0.0849  | 0.1641 |
| 6.00210  | 350.010               | 305.918 | 0.0509  | 0.0626 |
| 6.00207  | 350.012               | 305.895 | 0.0430  | 0.0624 |
| 4.00127  | 350.014               | 306.556 | 0.1262  | 0.1497 |
| 4.00123  | 350.004               | 306.376 | 0.0689  | 0.0482 |
| 4.00127  | 350.013               | 306.372 | 0.0662  | 0.0475 |
| 1.98985  | 350.008               | 307.569 | 0.0380  | 0.0666 |
| 1.98986  | 350.014               | 307.653 | 0.0644  | 0.1324 |
| 1.98983  | 350.004               | 307.579 | 0.0416  | 0.0704 |
| 0.487340 | 350.006               | 312.572 | 1.1877  | 0.0491 |
| 0.487348 | 350.005               | 312.475 | 1.1567  | 0.0974 |
| 0.487362 | 350.013               | 312.615 | 1.2009  | 0.2228 |
| 0.487383 | 350.005               | 312.440 | 1.1451  | 0.1237 |
| 0.487392 | 350.009               | 312.325 | 1.1075  | 0.0561 |
| 0.487399 | 350.013               | 312.653 | 1.2132  | 0.1553 |
|          | <hr/> $f(1, 1)$ <hr/> |         |         |        |
| 7.41209  | 400.206               | 330.751 | 0.0245  | 0.0513 |
| 7.41197  | 400.202               | 330.749 | 0.0245  | 0.0513 |
| 7.41182  | 400.202               | 330.742 | 0.0225  | 0.0513 |
| 7.41143  | 400.199               | 330.744 | 0.0238  | 0.0513 |
| 7.41144  | 400.204               | 330.751 | 0.0252  | 0.0513 |
| 7.41126  | 400.197               | 330.744 | 0.0240  | 0.0513 |
| 5.98077  | 400.194               | 329.735 | 0.0332  | 0.0481 |
| 5.98081  | 400.201               | 329.734 | 0.0321  | 0.0481 |
| 5.98068  | 400.195               | 329.730 | 0.0316  | 0.0481 |
| 4.00900  | 400.192               | 328.850 | 0.0243  | 0.0447 |
| 4.00906  | 400.199               | 328.848 | 0.0225  | 0.0447 |
| 4.00899  | 400.193               | 328.847 | 0.0232  | 0.0447 |
| 4.00893  | 400.197               | 328.852 | 0.0242  | 0.0447 |
| 4.00890  | 400.194               | 328.851 | 0.0242  | 0.0447 |
| 4.00893  | 400.199               | 328.854 | 0.0245  | 0.0447 |
| 2.00090  | 400.192               | 328.521 | -0.0091 | 0.0425 |
| 2.00092  | 400.195               | 328.526 | -0.0082 | 0.0425 |
| 2.00091  | 400.193               | 328.527 | -0.0076 | 0.0425 |

|           |         |         |         |        |
|-----------|---------|---------|---------|--------|
| 0.451871  | 400.197 | 328.782 | -0.0050 | 0.0422 |
| 0.451892  | 400.206 | 328.800 | -0.0006 | 0.0422 |
| 0.451900  | 400.199 | 328.762 | -0.0113 | 0.0423 |
| 0.451948  | 400.203 | 328.812 | 0.0035  | 0.0422 |
| 0.451954  | 400.201 | 328.793 | -0.0022 | 0.0422 |
| 0.451967  | 400.206 | 328.771 | -0.0094 | 0.0422 |
| <hr/>     |         |         |         |        |
| $f(0, 3)$ |         |         |         |        |
| 7.41162   | 400.207 | 330.815 | 0.0439  | 0.0513 |
| 7.41143   | 400.201 | 330.804 | 0.0417  | 0.0935 |
| 7.41137   | 400.203 | 330.768 | 0.0304  | 0.0707 |
| 7.41096   | 400.200 | 330.750 | 0.0254  | 0.0592 |
| 7.41096   | 400.203 | 330.821 | 0.0466  | 0.0522 |
| 7.41077   | 400.197 | 330.775 | 0.0334  | 0.0666 |
| 5.98037   | 400.194 | 329.835 | 0.0638  | 0.1360 |
| 5.98047   | 400.202 | 329.794 | 0.0503  | 0.1623 |
| 5.98030   | 400.194 | 329.842 | 0.0658  | 0.1403 |
| 4.00877   | 400.192 | 328.854 | 0.0256  | 0.0802 |
| 4.00881   | 400.200 | 328.895 | 0.0370  | 0.1099 |
| 4.00872   | 400.192 | 328.879 | 0.0330  | 0.1006 |
| 4.00866   | 400.196 | 329.007 | 0.0717  | 0.0800 |
| 4.00865   | 400.195 | 328.952 | 0.0549  | 0.0496 |
| 4.00864   | 400.198 | 328.957 | 0.0562  | 0.0449 |
| 2.00078   | 400.190 | 328.702 | 0.0461  | 0.0468 |
| 2.00080   | 400.196 | 328.685 | 0.0401  | 0.0429 |
| 2.00079   | 400.192 | 328.676 | 0.0381  | 0.0669 |
| 0.451847  | 400.198 | 333.742 | 1.5033  | 0.0433 |
| 0.451867  | 400.206 | 333.678 | 1.4832  | 0.0576 |
| 0.451875  | 400.199 | 333.754 | 1.5071  | 0.0442 |
| 0.451921  | 400.202 | 333.626 | 1.4678  | 0.0440 |
| 0.451930  | 400.202 | 333.646 | 1.4738  | 0.0433 |
| 0.451941  | 400.204 | 333.598 | 1.4589  | 0.0472 |
| <hr/>     |         |         |         |        |
| $f(0, 4)$ |         |         |         |        |
| 7.41163   | 400.208 | 330.768 | 0.0296  | 0.0518 |
| 7.41138   | 400.199 | 330.814 | 0.0449  | 0.0709 |
| 7.41138   | 400.204 | 330.739 | 0.0215  | 0.0516 |
| 7.41096   | 400.201 | 330.818 | 0.0458  | 0.0514 |
| 7.41094   | 400.202 | 330.830 | 0.0493  | 0.0603 |
| 7.41075   | 400.198 | 330.815 | 0.0454  | 0.0671 |
| 5.98037   | 400.194 | 329.887 | 0.0796  | 0.0664 |
| 5.98047   | 400.202 | 329.890 | 0.0795  | 0.0755 |
| 5.98030   | 400.194 | 329.885 | 0.0789  | 0.0590 |
| 4.00875   | 400.192 | 329.336 | 0.1721  | 0.0520 |
| 4.00882   | 400.200 | 328.949 | 0.0535  | 0.1238 |



|          |         |         |        |        |
|----------|---------|---------|--------|--------|
| 4.00872  | 400.192 | 328.970 | 0.0609 | 0.1199 |
| 4.00867  | 400.195 | 328.935 | 0.0499 | 0.1080 |
| 4.00868  | 400.197 | 329.018 | 0.0749 | 0.0463 |
| 4.00864  | 400.196 | 329.021 | 0.0757 | 0.0626 |
| 2.00077  | 400.190 | 328.658 | 0.0329 | 0.0829 |
| 2.00080  | 400.198 | 328.699 | 0.0444 | 0.1003 |
| 2.00078  | 400.191 | 328.629 | 0.0240 | 0.0527 |
| 0.451850 | 400.199 | 332.038 | 0.9849 | 0.2631 |
| 0.451869 | 400.205 | 332.222 | 1.0403 | 0.0770 |
| 0.451878 | 400.199 | 332.184 | 1.0296 | 0.0492 |
| 0.451922 | 400.201 | 332.184 | 1.0293 | 0.0771 |
| 0.451932 | 400.204 | 332.046 | 0.9870 | 0.0747 |
| 0.451941 | 400.203 | 332.169 | 1.0244 | 0.0735 |

---

$f(1, 1)$

---

|          |         |         |         |        |
|----------|---------|---------|---------|--------|
| 7.26519  | 500.463 | 371.192 | 0.0085  | 0.0508 |
| 7.26501  | 500.460 | 371.188 | 0.0078  | 0.0508 |
| 7.26500  | 500.464 | 371.193 | 0.0088  | 0.0508 |
| 7.26469  | 500.462 | 371.172 | 0.0035  | 0.0508 |
| 7.26463  | 500.464 | 371.192 | 0.0085  | 0.0508 |
| 7.26445  | 500.460 | 371.198 | 0.0106  | 0.0508 |
| 6.00866  | 500.460 | 369.698 | 0.0134  | 0.0481 |
| 6.00868  | 500.460 | 369.692 | 0.0119  | 0.0481 |
| 6.00863  | 500.465 | 369.688 | 0.0103  | 0.0481 |
| 4.00819  | 500.458 | 367.552 | 0.0003  | 0.0446 |
| 4.00823  | 500.463 | 367.573 | 0.0057  | 0.0446 |
| 4.00815  | 500.459 | 367.547 | -0.0011 | 0.0446 |
| 4.00807  | 500.457 | 367.569 | 0.0052  | 0.0446 |
| 4.00810  | 500.461 | 367.566 | 0.0039  | 0.0446 |
| 4.00808  | 500.461 | 367.568 | 0.0044  | 0.0446 |
| 1.98841  | 500.462 | 365.742 | -0.0215 | 0.0424 |
| 1.98839  | 500.459 | 365.727 | -0.0255 | 0.0424 |
| 1.98836  | 500.455 | 365.726 | -0.0252 | 0.0424 |
| 0.476617 | 500.500 | 364.737 | -0.0137 | 0.0422 |
| 0.476608 | 500.504 | 364.727 | -0.0168 | 0.0422 |
| 0.476596 | 500.500 | 364.738 | -0.0135 | 0.0422 |
| 0.476576 | 500.500 | 364.754 | -0.0091 | 0.0421 |
| 0.476571 | 500.505 | 364.756 | -0.0090 | 0.0421 |
| 0.476557 | 500.501 | 364.809 | 0.0060  | 0.0421 |

---

$f(0, 3)$

---

|         |         |         |        |        |
|---------|---------|---------|--------|--------|
| 7.26472 | 500.462 | 371.218 | 0.0157 | 0.0523 |
| 7.26459 | 500.460 | 371.242 | 0.0226 | 0.0509 |
| 7.26458 | 500.465 | 371.282 | 0.0329 | 0.0562 |
| 7.26427 | 500.462 | 371.374 | 0.0579 | 0.1277 |

|          |         |         |         |        |
|----------|---------|---------|---------|--------|
| 7.26417  | 500.464 | 371.241 | 0.0221  | 0.0526 |
| 7.26400  | 500.460 | 371.232 | 0.0200  | 0.0515 |
| 6.00831  | 500.459 | 369.746 | 0.0268  | 0.0571 |
| 6.00832  | 500.461 | 369.900 | 0.0682  | 0.1542 |
| 6.00827  | 500.465 | 369.950 | 0.0814  | 0.1289 |
| 4.00797  | 500.459 | 367.756 | 0.0559  | 0.0522 |
| 4.00798  | 500.463 | 367.660 | 0.0295  | 0.0488 |
| 4.00794  | 500.458 | 367.793 | 0.0660  | 0.0732 |
| 4.00785  | 500.457 | 367.774 | 0.0610  | 0.0449 |
| 4.00786  | 500.462 | 367.783 | 0.0629  | 0.0452 |
| 4.00785  | 500.461 | 367.686 | 0.0367  | 0.0448 |
| 1.98830  | 500.462 | 365.804 | -0.0044 | 0.0504 |
| 1.98827  | 500.458 | 365.875 | 0.0152  | 0.0881 |
| 1.98826  | 500.455 | 365.888 | 0.0192  | 0.0933 |
| 0.476591 | 500.501 | 370.018 | 1.4338  | 0.0511 |
| 0.476582 | 500.503 | 370.030 | 1.4370  | 0.0507 |
| 0.476570 | 500.500 | 370.053 | 1.4436  | 0.0437 |
| 0.476550 | 500.500 | 370.025 | 1.4358  | 0.0448 |
| 0.476544 | 500.505 | 370.059 | 1.4449  | 0.0429 |
| 0.476530 | 500.500 | 370.060 | 1.4456  | 0.0424 |

---

$f(0, 4)$

---

|          |         |         |        |        |
|----------|---------|---------|--------|--------|
| 7.26469  | 500.461 | 371.286 | 0.0344 | 0.0508 |
| 7.26458  | 500.461 | 371.252 | 0.0252 | 0.0656 |
| 7.26456  | 500.465 | 371.293 | 0.0358 | 0.0532 |
| 7.26426  | 500.463 | 371.304 | 0.0392 | 0.0508 |
| 7.26413  | 500.463 | 371.275 | 0.0311 | 0.0509 |
| 7.26401  | 500.460 | 371.287 | 0.0350 | 0.0543 |
| 6.00829  | 500.459 | 369.714 | 0.0181 | 0.0920 |
| 6.00834  | 500.462 | 369.767 | 0.0321 | 0.1341 |
| 6.00826  | 500.465 | 369.718 | 0.0188 | 0.0952 |
| 4.00798  | 500.460 | 367.598 | 0.0129 | 0.0622 |
| 4.00795  | 500.462 | 367.628 | 0.0209 | 0.0792 |
| 4.00792  | 500.458 | 367.718 | 0.0457 | 0.0446 |
| 4.00785  | 500.457 | 367.782 | 0.0632 | 0.2019 |
| 4.00788  | 500.462 | 367.612 | 0.0163 | 0.0827 |
| 4.00785  | 500.460 | 367.594 | 0.0117 | 0.0696 |
| 1.98830  | 500.462 | 365.866 | 0.0125 | 0.1103 |
| 1.98827  | 500.457 | 366.019 | 0.0546 | 0.0823 |
| 1.98827  | 500.456 | 365.861 | 0.0117 | 0.1055 |
| 0.476590 | 500.502 | 367.914 | 0.8570 | 0.0836 |
| 0.476580 | 500.502 | 367.890 | 0.8505 | 0.1057 |
| 0.476569 | 500.500 | 367.738 | 0.8091 | 0.0806 |
| 0.476549 | 500.501 | 368.212 | 0.9388 | 0.0707 |

|                 |                |                |               |               |
|-----------------|----------------|----------------|---------------|---------------|
| <i>0.476543</i> | <i>500.505</i> | <i>368.196</i> | <i>0.9341</i> | <i>0.1463</i> |
| <i>0.476528</i> | <i>500.499</i> | <i>368.343</i> | <i>0.9751</i> | <i>0.0773</i> |

---

Table S2. Experimental ( $p, c, T, x$ ) data for Ar/CO<sub>2</sub> ( $x_{\text{CO}_2} = 0.74981$ , mole fraction), relative deviations of the experimental data  $c_{\text{exp}}$  from speeds of sound  $c_{\text{EOS}}$  calculated with the EOS-CG equation of state of Gernert and Span [2], and the combined expanded uncertainty  $U_c$  ( $k = 2$ ) of the speed of sound measurements are listed;  $p$  is the pressure and  $T$  is the temperature (ITS-90). The standard uncertainty in temperature was less than 20 mK and the standard uncertainty in pressure was  $(20 \cdot 10^{-6} \cdot p + 0.15 \text{ kPa})$  for  $p < 5 \text{ MPa}$  and  $(20 \cdot 10^{-6} \cdot p + 1.0 \text{ kPa})$  for  $p > 5 \text{ MPa}$ . All experimental values are listed; values written in italics are regarded as outliers.

| $p / \text{MPa}$ | $T / \text{K}$ | $c_{\text{exp}} / \text{m s}^{-1}$ | $100 \left( \frac{c_{\text{exp}} - c_{\text{EOS}}}{c_{\text{EOS}}} \right)$ | $U_c(c) c^{-1} / \%$ |
|------------------|----------------|------------------------------------|-----------------------------------------------------------------------------|----------------------|
|                  |                | $f(1, 1)$                          |                                                                             |                      |
| 5.50305          | 276.091        | 227.574                            | -0.4955                                                                     | 0.0500               |
| 5.50291          | 276.085        | 227.574                            | -0.4932                                                                     | 0.0500               |
| 5.50293          | 276.091        | 227.976                            | -0.3207                                                                     | 0.0503               |
| 5.39998          | 276.095        | 228.576                            | -0.4362                                                                     | 0.0497               |
| 5.39984          | 276.090        | 228.574                            | -0.4346                                                                     | 0.0497               |
| 5.39970          | 276.085        | 228.574                            | -0.4325                                                                     | 0.0497               |
| 5.29611          | 276.095        | 229.565                            | -0.3804                                                                     | 0.0494               |
| 5.29598          | 276.094        | 229.566                            | -0.3793                                                                     | 0.0494               |
| 5.29581          | 276.087        | 229.561                            | -0.3790                                                                     | 0.0494               |
| 4.99607          | 276.096        | 232.322                            | -0.2520                                                                     | 0.0486               |
| 4.99592          | 276.094        | 232.322                            | -0.2518                                                                     | 0.0486               |
| 4.99578          | 276.088        | 232.314                            | -0.2529                                                                     | 0.0486               |
| 4.99545          | 276.088        | 232.273                            | -0.2720                                                                     | 0.0486               |
| 4.99548          | 276.093        | 232.279                            | -0.2714                                                                     | 0.0486               |
| 4.99543          | 276.090        | 232.279                            | -0.2698                                                                     | 0.0486               |
| 4.00344          | 276.080        | 240.297                            | -0.1801                                                                     | 0.0464               |
| 4.00356          | 276.091        | 240.301                            | -0.1822                                                                     | 0.0464               |
| 4.00361          | 276.089        | 240.303                            | -0.1802                                                                     | 0.0464               |
| 4.00365          | 276.084        | 240.280                            | -0.1881                                                                     | 0.0464               |
| 4.00367          | 276.091        | 240.280                            | -0.1905                                                                     | 0.0464               |
| 4.00371          | 276.093        | 240.280                            | -0.1909                                                                     | 0.0464               |
| 1.99904          | 276.091        | 255.065                            | -0.0557                                                                     | 0.0431               |
| 1.99905          | 276.087        | 255.070                            | -0.0531                                                                     | 0.0431               |
| 1.99905          | 276.083        | 255.071                            | -0.0517                                                                     | 0.0431               |
| 1.99905          | 276.089        | 255.075                            | -0.0515                                                                     | 0.0431               |
| 1.99906          | 276.093        | 255.071                            | -0.0536                                                                     | 0.0431               |
| 1.99905          | 276.087        | 255.071                            | -0.0525                                                                     | 0.0431               |
| 0.501099         | 276.082        | 264.877                            | -0.0627                                                                     | 0.0424               |
| 0.501116         | 276.086        | 264.901                            | -0.0543                                                                     | 0.0425               |
| 0.501129         | 276.092        | 264.916                            | -0.0496                                                                     | 0.0425               |

|                       |         |         |         |        |
|-----------------------|---------|---------|---------|--------|
| 0.501158              | 276.087 | 264.937 | -0.0406 | 0.0423 |
| 0.501161              | 276.085 | 264.895 | -0.0563 | 0.0425 |
| 0.501167              | 276.091 | 264.928 | -0.0447 | 0.0424 |
| <hr/> $f(0, 3)$ <hr/> |         |         |         |        |
| 5.50250               | 276.091 | 230.299 | 0.6940  | 0.0503 |
| 5.50236               | 276.085 | 230.298 | 0.6962  | 0.0508 |
| 5.50238               | 276.091 | 230.295 | 0.6914  | 0.0498 |
| 5.39945               | 276.095 | 231.345 | 0.7683  | 0.0496 |
| 5.39931               | 276.090 | 231.341 | 0.7689  | 0.0496 |
| 5.39917               | 276.085 | 231.340 | 0.7707  | 0.0495 |
| 5.29560               | 276.095 | 229.017 | -0.6200 | 0.0511 |
| 5.29547               | 276.094 | 229.014 | -0.6209 | 0.0495 |
| 5.29530               | 276.087 | 229.026 | -0.6128 | 0.0493 |
| 4.99560               | 276.096 | 231.838 | -0.4614 | 0.0485 |
| 4.99545               | 276.094 | 231.835 | -0.4624 | 0.0485 |
| 4.99530               | 276.088 | 231.827 | -0.4636 | 0.0487 |
| 4.99497               | 276.088 | 231.830 | -0.4636 | 0.0489 |
| 4.99501               | 276.093 | 231.840 | -0.4616 | 0.0492 |
| 4.99496               | 276.090 | 231.821 | -0.4683 | 0.0485 |
| 4.00309               | 276.080 | 240.335 | -0.1658 | 0.0469 |
| 4.00320               | 276.091 | 240.308 | -0.1801 | 0.0465 |
| 4.00325               | 276.089 | 240.250 | -0.2034 | 0.0485 |
| 4.00329               | 276.084 | 240.393 | -0.1422 | 0.0721 |
| 4.00332               | 276.091 | 240.308 | -0.1801 | 0.0467 |
| 4.00336               | 276.093 | 240.266 | -0.1978 | 0.0759 |
| 1.99889               | 276.091 | 255.103 | -0.0410 | 0.0430 |
| 1.99889               | 276.087 | 255.159 | -0.0185 | 0.1592 |
| 1.99890               | 276.083 | 255.279 | 0.0295  | 0.1695 |
| 1.99889               | 276.089 | 255.109 | -0.0383 | 0.0452 |
| 1.99890               | 276.093 | 255.208 | -0.0003 | 0.1441 |
| 1.99889               | 276.087 | 255.244 | 0.0152  | 0.1016 |
| 0.501062              | 276.082 | 268.845 | 1.4348  | 0.0436 |
| 0.501079              | 276.086 | 268.845 | 1.4341  | 0.0447 |
| 0.501092              | 276.092 | 268.850 | 1.4348  | 0.0435 |
| 0.501121              | 276.087 | 268.846 | 1.4342  | 0.0445 |
| 0.501125              | 276.085 | 268.849 | 1.4359  | 0.0436 |
| 0.501131              | 276.091 | 268.847 | 1.4341  | 0.0445 |
| <hr/> $f(0, 4)$ <hr/> |         |         |         |        |
| 5.50246               | 276.089 | 226.976 | -0.7579 | 0.0499 |
| 5.50237               | 276.086 | 226.976 | -0.7567 | 0.0501 |
| 5.50240               | 276.092 | 226.979 | -0.7590 | 0.0499 |
| 5.39944               | 276.095 | 227.999 | -0.6892 | 0.0496 |
| 5.39929               | 276.089 | 227.997 | -0.6872 | 0.0496 |

|          |         |         |         |        |
|----------|---------|---------|---------|--------|
| 5.39916  | 276.085 | 227.994 | -0.6870 | 0.0496 |
| 5.29558  | 276.096 | 229.010 | -0.6232 | 0.0495 |
| 5.29543  | 276.092 | 229.011 | -0.6218 | 0.0494 |
| 5.29527  | 276.087 | 229.011 | -0.6194 | 0.0494 |
| 4.99559  | 276.096 | 231.820 | -0.4693 | 0.0506 |
| 4.99542  | 276.093 | 231.832 | -0.4632 | 0.0501 |
| 4.99526  | 276.087 | 231.824 | -0.4647 | 0.0488 |
| 4.99500  | 276.089 | 231.826 | -0.4656 | 0.0489 |
| 4.99498  | 276.093 | 231.811 | -0.4741 | 0.0511 |
| 4.99496  | 276.088 | 231.819 | -0.4687 | 0.0488 |
| 4.00312  | 276.082 | 240.302 | -0.1798 | 0.0493 |
| 4.00321  | 276.091 | 240.284 | -0.1906 | 0.0483 |
| 4.00324  | 276.088 | 240.264 | -0.1971 | 0.0481 |
| 4.00330  | 276.085 | 240.281 | -0.1889 | 0.0471 |
| 4.00333  | 276.092 | 240.284 | -0.1903 | 0.0514 |
| 4.00335  | 276.092 | 240.279 | -0.1922 | 0.0489 |
| 1.99889  | 276.091 | 255.168 | -0.0157 | 0.0447 |
| 1.99889  | 276.086 | 255.162 | -0.0168 | 0.0438 |
| 1.99889  | 276.084 | 255.150 | -0.0209 | 0.0434 |
| 1.99890  | 276.090 | 255.153 | -0.0215 | 0.0643 |
| 1.99890  | 276.092 | 255.142 | -0.0260 | 0.0514 |
| 1.99888  | 276.086 | 255.085 | -0.0468 | 0.0527 |
| 0.501064 | 276.082 | 267.783 | 1.0340  | 0.1477 |
| 0.501081 | 276.088 | 267.770 | 1.0281  | 0.1198 |
| 0.501094 | 276.092 | 267.748 | 1.0192  | 0.1609 |
| 0.501121 | 276.086 | 267.809 | 1.0431  | 0.0586 |
| 0.501125 | 276.086 | 267.800 | 1.0399  | 0.0784 |
| 0.501132 | 276.092 | 267.814 | 1.0441  | 0.1866 |

---

$f(1, 1)$

---

|         |         |         |         |        |
|---------|---------|---------|---------|--------|
| 8.05839 | 290.020 | 227.989 | -1.2307 | 0.0561 |
| 8.05800 | 290.016 | 227.962 | -1.2411 | 0.0558 |
| 8.05761 | 290.011 | 227.980 | -1.2309 | 0.0561 |
| 8.05690 | 290.012 | 227.504 | -1.4386 | 0.0558 |
| 8.05695 | 290.016 | 227.499 | -1.4429 | 0.0558 |
| 8.05677 | 290.009 | 227.512 | -1.4339 | 0.0558 |
| 6.01229 | 290.002 | 240.240 | -0.1419 | 0.0499 |
| 6.01248 | 290.007 | 240.254 | -0.1381 | 0.0500 |
| 6.01265 | 290.011 | 240.261 | -0.1364 | 0.0500 |
| 6.01286 | 290.009 | 240.259 | -0.1361 | 0.0499 |
| 6.01282 | 290.007 | 240.254 | -0.1374 | 0.0499 |
| 6.01284 | 290.010 | 240.263 | -0.1349 | 0.0499 |
| 4.02343 | 290.011 | 251.634 | -0.0957 | 0.0458 |
| 4.02346 | 290.006 | 251.639 | -0.0922 | 0.0458 |

|          |         |         |         |        |
|----------|---------|---------|---------|--------|
| 4.02347  | 290.005 | 251.641 | -0.0914 | 0.0458 |
| 1.97899  | 290.004 | 263.294 | -0.0463 | 0.0429 |
| 1.97902  | 290.011 | 263.293 | -0.0479 | 0.0429 |
| 1.97903  | 290.009 | 263.297 | -0.0458 | 0.0429 |
| 1.97901  | 290.007 | 263.298 | -0.0451 | 0.0429 |
| 1.97901  | 290.010 | 263.302 | -0.0443 | 0.0429 |
| 1.97903  | 290.014 | 263.298 | -0.0467 | 0.0429 |
| 0.485276 | 290.006 | 271.437 | -0.0453 | 0.0424 |
| 0.485293 | 290.006 | 271.444 | -0.0429 | 0.0424 |
| 0.485313 | 290.013 | 271.429 | -0.0496 | 0.0424 |

---

$f(0, 3)$

---

|                 |                |                |                |               |
|-----------------|----------------|----------------|----------------|---------------|
| 8.05749         | 290.020        | 227.340        | -1.5130        | 0.0662        |
| 8.05710         | 290.016        | 227.320        | -1.5201        | 0.0570        |
| 8.05671         | 290.011        | 227.304        | -1.5250        | 0.0561        |
| <i>8.05601</i>  | <i>290.012</i> | <i>228.397</i> | <i>-1.0531</i> | <i>0.4326</i> |
| <i>8.05606</i>  | <i>290.016</i> | <i>228.310</i> | <i>-1.0931</i> | <i>0.5299</i> |
| <i>8.05588</i>  | <i>290.009</i> | <i>228.989</i> | <i>-0.7955</i> | <i>0.2765</i> |
| 6.01172         | 290.002        | 239.653        | -0.3872        | 0.0504        |
| 6.01191         | 290.007        | 239.668        | -0.3828        | 0.0499        |
| 6.01209         | 290.011        | 239.662        | -0.3864        | 0.0501        |
| <i>6.01229</i>  | <i>290.009</i> | <i>243.102</i> | <i>1.0448</i>  | <i>0.0509</i> |
| <i>6.01225</i>  | <i>290.007</i> | <i>243.104</i> | <i>1.0460</i>  | <i>0.0499</i> |
| <i>6.01227</i>  | <i>290.010</i> | <i>243.117</i> | <i>1.0500</i>  | <i>0.0600</i> |
| 4.02309         | 290.011        | 251.713        | -0.0653        | 0.0946        |
| 4.02313         | 290.006        | 251.726        | -0.0585        | 0.0731        |
| 4.02314         | 290.005        | 251.683        | -0.0753        | 0.0477        |
| 1.97884         | 290.004        | 263.353        | -0.0238        | 0.0442        |
| 1.97887         | 290.011        | 263.355        | -0.0246        | 0.0640        |
| 1.97888         | 290.009        | 263.418        | -0.0001        | 0.0431        |
| 1.97886         | 290.007        | 263.371        | -0.0178        | 0.0508        |
| 1.97886         | 290.010        | 263.366        | -0.0204        | 0.0643        |
| 1.97888         | 290.014        | 263.384        | -0.0142        | 0.0992        |
| <i>0.485241</i> | <i>290.006</i> | <i>275.446</i> | <i>1.4310</i>  | <i>0.0472</i> |
| <i>0.485259</i> | <i>290.006</i> | <i>275.449</i> | <i>1.4319</i>  | <i>0.0458</i> |
| <i>0.485279</i> | <i>290.013</i> | <i>275.455</i> | <i>1.4330</i>  | <i>0.0464</i> |

---

$f(0, 4)$

---

|                |                |                |                |               |
|----------------|----------------|----------------|----------------|---------------|
| 8.05742        | 290.020        | 227.359        | -1.5049        | 0.0559        |
| 8.05703        | 290.014        | 227.348        | -1.5076        | 0.0558        |
| 8.05668        | 290.011        | 227.343        | -1.5083        | 0.0558        |
| <i>8.05601</i> | <i>290.013</i> | <i>228.112</i> | <i>-1.1772</i> | <i>0.4545</i> |
| <i>8.05603</i> | <i>290.016</i> | <i>227.778</i> | <i>-1.3232</i> | <i>0.4214</i> |
| <i>8.05586</i> | <i>290.009</i> | <i>227.708</i> | <i>-1.3501</i> | <i>0.3503</i> |
| 6.01175        | 290.002        | 239.667        | -0.3814        | 0.0596        |

|          |         |         |         |        |
|----------|---------|---------|---------|--------|
| 6.01196  | 290.008 | 239.613 | -0.4060 | 0.0755 |
| 6.01210  | 290.010 | 239.660 | -0.3873 | 0.0501 |
| 6.01227  | 290.008 | 239.674 | -0.3799 | 0.0501 |
| 6.01225  | 290.008 | 239.675 | -0.3793 | 0.0511 |
| 6.01230  | 290.011 | 239.670 | -0.3830 | 0.0502 |
| 4.02310  | 290.011 | 251.639 | -0.0944 | 0.0458 |
| 4.02314  | 290.005 | 251.660 | -0.0842 | 0.0463 |
| 4.02316  | 290.006 | 251.641 | -0.0923 | 0.0467 |
| 1.97884  | 290.005 | 263.396 | -0.0079 | 0.0465 |
| 1.97887  | 290.011 | 263.392 | -0.0106 | 0.0605 |
| 1.97887  | 290.008 | 263.421 | 0.0010  | 0.0478 |
| 1.97886  | 290.007 | 263.427 | 0.0037  | 0.0470 |
| 1.97887  | 290.011 | 263.416 | -0.0017 | 0.0431 |
| 1.97887  | 290.013 | 263.397 | -0.0090 | 0.0679 |
| 0.485244 | 290.005 | 273.340 | 0.6556  | 0.0488 |
| 0.485263 | 290.007 | 272.879 | 0.4854  | 0.5089 |
| 0.485282 | 290.013 | 272.965 | 0.5162  | 0.3667 |

---

$f(1, 1)$

---

|          |         |         |         |        |
|----------|---------|---------|---------|--------|
| 8.06300  | 310.005 | 251.505 | -0.2766 | 0.0541 |
| 8.06310  | 310.004 | 251.513 | -0.2728 | 0.0541 |
| 8.06323  | 310.006 | 251.518 | -0.2718 | 0.0541 |
| 8.06348  | 310.012 | 251.525 | -0.2709 | 0.0541 |
| 8.06355  | 310.012 | 251.531 | -0.2684 | 0.0541 |
| 8.06343  | 310.007 | 251.535 | -0.2651 | 0.0541 |
| 6.00013  | 310.005 | 258.010 | -0.0789 | 0.0491 |
| 6.00026  | 310.009 | 258.016 | -0.0774 | 0.0491 |
| 6.00028  | 310.006 | 258.019 | -0.0753 | 0.0491 |
| 4.02411  | 310.004 | 265.604 | -0.0218 | 0.0454 |
| 4.02419  | 310.010 | 265.615 | -0.0191 | 0.0454 |
| 4.02422  | 310.010 | 265.612 | -0.0202 | 0.0454 |
| 4.02420  | 310.009 | 265.613 | -0.0195 | 0.0454 |
| 4.02418  | 310.007 | 265.622 | -0.0158 | 0.0454 |
| 4.02419  | 310.011 | 265.617 | -0.0186 | 0.0454 |
| 1.98103  | 310.004 | 274.001 | -0.0270 | 0.0428 |
| 1.98106  | 310.010 | 274.006 | -0.0265 | 0.0428 |
| 1.98107  | 310.011 | 274.011 | -0.0244 | 0.0428 |
| 0.488271 | 310.007 | 280.308 | -0.0280 | 0.0423 |
| 0.488277 | 310.005 | 280.285 | -0.0359 | 0.0423 |
| 0.488289 | 310.011 | 280.309 | -0.0283 | 0.0423 |
| 0.488319 | 310.014 | 262.147 | -6.5060 | 0.1366 |
| 0.488321 | 310.010 | 256.513 | -8.5149 | 0.2575 |
| 0.488323 | 310.006 | 260.623 | -7.0482 | 0.1105 |

---

$f(0, 3)$

---



|          |         |         |         |        |
|----------|---------|---------|---------|--------|
| 8.06222  | 310.005 | 251.516 | -0.2728 | 0.5062 |
| 8.06232  | 310.004 | 251.372 | -0.3295 | 0.4506 |
| 8.06245  | 310.006 | 251.486 | -0.2849 | 0.1229 |
| 8.06270  | 310.012 | 251.528 | -0.2700 | 0.0544 |
| 8.06277  | 310.012 | 251.476 | -0.2906 | 0.0557 |
| 8.06265  | 310.007 | 251.537 | -0.2650 | 0.0662 |
| 5.99962  | 310.005 | 258.004 | -0.0818 | 0.0490 |
| 5.99974  | 310.009 | 258.064 | -0.0594 | 0.0858 |
| 5.99977  | 310.006 | 258.017 | -0.0767 | 0.1357 |
| 4.02380  | 310.004 | 265.711 | 0.0182  | 0.0458 |
| 4.02387  | 310.010 | 265.538 | -0.0483 | 0.0496 |
| 4.02390  | 310.010 | 265.667 | 0.0001  | 0.0736 |
| 4.02388  | 310.009 | 265.646 | -0.0073 | 0.0456 |
| 4.02386  | 310.007 | 265.835 | 0.0640  | 0.1690 |
| 4.02387  | 310.011 | 265.727 | 0.0224  | 0.2921 |
| 1.98089  | 310.004 | 274.089 | 0.0048  | 0.0430 |
| 1.98092  | 310.010 | 274.115 | 0.0135  | 0.0435 |
| 1.98092  | 310.011 | 274.119 | 0.0148  | 0.0427 |
| 0.488237 | 310.007 | 284.420 | 1.4389  | 0.0447 |
| 0.488243 | 310.005 | 284.422 | 1.4399  | 0.0479 |
| 0.488255 | 310.011 | 284.432 | 1.4426  | 0.0481 |
| 0.488286 | 310.014 | 275.019 | -1.9153 | 0.0487 |
| 0.488288 | 310.010 | 275.063 | -1.8990 | 0.0670 |
| 0.488290 | 310.006 | 275.027 | -1.9110 | 0.0419 |

$f(0, 4)$

|         |         |         |         |        |
|---------|---------|---------|---------|--------|
| 8.06224 | 310.005 | 251.397 | -0.3199 | 0.0552 |
| 8.06234 | 310.004 | 251.398 | -0.3189 | 0.0541 |
| 8.06250 | 310.007 | 251.402 | -0.3185 | 0.0554 |
| 8.06273 | 310.013 | 251.424 | -0.3116 | 0.0546 |
| 8.06276 | 310.011 | 251.435 | -0.3068 | 0.0563 |
| 8.06262 | 310.006 | 251.406 | -0.3166 | 0.0556 |
| 5.99965 | 310.007 | 257.977 | -0.0926 | 0.0491 |
| 5.99977 | 310.009 | 257.994 | -0.0862 | 0.0507 |
| 5.99977 | 310.006 | 257.989 | -0.0873 | 0.0491 |
| 4.02381 | 310.005 | 265.799 | 0.0511  | 0.1295 |
| 4.02389 | 310.011 | 265.783 | 0.0437  | 0.1237 |
| 4.02389 | 310.009 | 265.622 | -0.0166 | 0.1461 |
| 4.02389 | 310.008 | 265.675 | 0.0037  | 0.0464 |
| 4.02386 | 310.007 | 265.678 | 0.0050  | 0.0604 |
| 4.02389 | 310.012 | 265.653 | -0.0055 | 0.0575 |
| 1.98089 | 310.005 | 274.110 | 0.0124  | 0.0493 |
| 1.98092 | 310.011 | 274.132 | 0.0193  | 0.0433 |
| 1.98092 | 310.010 | 274.123 | 0.0164  | 0.0428 |

|          |         |           |         |        |
|----------|---------|-----------|---------|--------|
| 0.488239 | 310.006 | 283.347   | 1.0562  | 0.0502 |
| 0.488245 | 310.006 | 283.258   | 1.0247  | 0.0835 |
| 0.488258 | 310.012 | 283.213   | 1.0077  | 0.0653 |
| 0.488286 | 310.014 | 274.968   | -1.9335 | 0.0979 |
| 0.488288 | 310.009 | 274.882   | -1.9632 | 0.0421 |
| 0.488291 | 310.006 | 275.023   | -1.9127 | 0.0444 |
|          |         | $f(1, 1)$ |         |        |
| 8.20136  | 350.013 | 282.134   | -0.0305 | 0.0536 |
| 8.20122  | 350.015 | 282.127   | -0.0334 | 0.0536 |
| 8.20114  | 350.016 | 282.121   | -0.0358 | 0.0536 |
| 8.20077  | 350.012 | 282.121   | -0.0350 | 0.0536 |
| 8.20079  | 350.015 | 282.119   | -0.0362 | 0.0536 |
| 8.20058  | 350.008 | 282.115   | -0.0361 | 0.0536 |
| 6.01833  | 350.015 | 284.809   | 0.0005  | 0.0485 |
| 6.01828  | 350.009 | 284.800   | -0.0013 | 0.0485 |
| 6.01822  | 350.007 | 284.803   | 0.0003  | 0.0485 |
| 6.01826  | 350.015 | 284.802   | -0.0016 | 0.0485 |
| 6.01815  | 350.008 | 284.807   | 0.0014  | 0.0485 |
| 6.01814  | 350.011 | 284.802   | -0.0012 | 0.0485 |
| 4.01064  | 350.011 | 288.499   | -0.0013 | 0.0449 |
| 4.01065  | 350.013 | 288.510   | 0.0016  | 0.0449 |
| 4.01056  | 350.006 | 288.503   | 0.0006  | 0.0449 |
| 4.01058  | 350.016 | 288.504   | -0.0008 | 0.0449 |
| 4.01054  | 350.009 | 288.512   | 0.0032  | 0.0449 |
| 4.01051  | 350.009 | 288.502   | -0.0001 | 0.0449 |
| 1.98740  | 350.011 | 293.078   | -0.0197 | 0.0426 |
| 1.98740  | 350.010 | 293.081   | -0.0186 | 0.0426 |
| 1.98739  | 350.012 | 293.083   | -0.0181 | 0.0426 |
| 1.98736  | 350.007 | 293.082   | -0.0177 | 0.0426 |
| 1.98736  | 350.007 | 293.084   | -0.0171 | 0.0426 |
| 1.98737  | 350.014 | 293.076   | -0.0210 | 0.0426 |
| 0.500788 | 350.014 | 296.881   | -0.0260 | 0.0422 |
| 0.500795 | 350.008 | 296.791   | -0.0558 | 0.0423 |
| 0.500801 | 350.006 | 296.882   | -0.0247 | 0.0422 |
| 0.500839 | 350.013 | 296.847   | -0.0373 | 0.0422 |
| 0.500838 | 350.006 | 296.832   | -0.0415 | 0.0422 |
| 0.500849 | 350.012 | 296.882   | -0.0256 | 0.0421 |
|          |         | $f(0, 3)$ |         |        |
| 8.20067  | 350.013 | 282.101   | -0.0421 | 0.0536 |
| 8.20052  | 350.015 | 282.092   | -0.0456 | 0.0541 |
| 8.20044  | 350.016 | 282.089   | -0.0471 | 0.0536 |
| 8.20007  | 350.012 | 282.092   | -0.0452 | 0.0537 |
| 8.20009  | 350.015 | 282.082   | -0.0493 | 0.0535 |

|          |         |           |         |        |
|----------|---------|-----------|---------|--------|
| 8.19988  | 350.008 | 282.078   | -0.0491 | 0.0541 |
| 6.01786  | 350.015 | 284.819   | 0.0041  | 0.0495 |
| 6.01781  | 350.009 | 284.828   | 0.0084  | 0.0501 |
| 6.01775  | 350.007 | 284.821   | 0.0062  | 0.0490 |
| 6.01779  | 350.015 | 284.818   | 0.0036  | 0.0495 |
| 6.01768  | 350.008 | 284.825   | 0.0075  | 0.0485 |
| 6.01767  | 350.011 | 284.810   | 0.0014  | 0.0485 |
| 4.01035  | 350.011 | 288.568   | 0.0223  | 0.0449 |
| 4.01036  | 350.013 | 288.586   | 0.0281  | 0.0486 |
| 4.01028  | 350.006 | 288.576   | 0.0260  | 0.0452 |
| 4.01030  | 350.016 | 288.577   | 0.0245  | 0.0452 |
| 4.01025  | 350.009 | 288.571   | 0.0236  | 0.0465 |
| 4.01022  | 350.009 | 288.585   | 0.0283  | 0.0454 |
| 1.98727  | 350.011 | 293.232   | 0.0330  | 0.0432 |
| 1.98727  | 350.010 | 293.222   | 0.0296  | 0.0470 |
| 1.98726  | 350.012 | 293.240   | 0.0356  | 0.0695 |
| 1.98723  | 350.007 | 293.180   | 0.0156  | 0.0722 |
| 1.98722  | 350.007 | 293.175   | 0.0140  | 0.0647 |
| 1.98724  | 350.014 | 293.218   | 0.0277  | 0.0578 |
| 0.500755 | 350.014 | 301.230   | 1.4384  | 0.0438 |
| 0.500763 | 350.008 | 301.407   | 1.4989  | 0.1855 |
| 0.500769 | 350.006 | 301.224   | 1.4376  | 0.0442 |
| 0.500806 | 350.013 | 301.227   | 1.4377  | 0.0441 |
| 0.500806 | 350.006 | 301.219   | 1.4360  | 0.0435 |
| 0.500817 | 350.012 | 301.223   | 1.4364  | 0.0436 |
|          |         | $f(0, 4)$ |         |        |
| 8.20061  | 350.011 | 282.079   | -0.0496 | 0.0649 |
| 8.20055  | 350.017 | 282.102   | -0.0427 | 0.0565 |
| 8.20041  | 350.015 | 282.081   | -0.0497 | 0.0631 |
| 8.20011  | 350.014 | 282.095   | -0.0444 | 0.0546 |
| 8.20007  | 350.014 | 282.071   | -0.0531 | 0.0674 |
| 8.19985  | 350.007 | 282.040   | -0.0625 | 0.0552 |
| 6.01787  | 350.015 | 284.797   | -0.0036 | 0.0717 |
| 6.01778  | 350.007 | 284.809   | 0.0020  | 0.0531 |
| 6.01777  | 350.009 | 284.795   | -0.0032 | 0.0608 |
| 6.01775  | 350.013 | 284.846   | 0.0139  | 0.0511 |
| 6.01767  | 350.007 | 284.765   | -0.0133 | 0.0906 |
| 6.01770  | 350.013 | 284.822   | 0.0055  | 0.0519 |
| 4.01037  | 350.012 | 288.608   | 0.0360  | 0.0678 |
| 4.01034  | 350.012 | 288.621   | 0.0404  | 0.0503 |
| 4.01028  | 350.006 | 288.522   | 0.0073  | 0.1085 |
| 4.01029  | 350.015 | 288.516   | 0.0032  | 0.1032 |
| 4.01025  | 350.008 | 288.536   | 0.0116  | 0.0844 |

|          |         |         |         |        |
|----------|---------|---------|---------|--------|
| 4.01023  | 350.010 | 288.522 | 0.0062  | 0.1066 |
| 1.98728  | 350.013 | 293.161 | 0.0082  | 0.0630 |
| 1.98726  | 350.008 | 293.108 | -0.0089 | 0.0790 |
| 1.98727  | 350.013 | 293.117 | -0.0068 | 0.0631 |
| 1.98723  | 350.006 | 293.026 | -0.0367 | 0.0481 |
| 1.98722  | 350.007 | 293.126 | -0.0029 | 0.0547 |
| 1.98724  | 350.015 | 293.234 | 0.0328  | 0.0490 |
| 0.500757 | 350.014 | 299.097 | 0.7202  | 0.0925 |
| 0.500763 | 350.006 | 298.960 | 0.6750  | 0.2384 |
| 0.500772 | 350.008 | 299.030 | 0.6984  | 0.1955 |
| 0.500806 | 350.012 | 299.717 | 0.9292  | 0.1277 |
| 0.500807 | 350.006 | 299.684 | 0.9191  | 0.1782 |
| 0.500819 | 350.013 | 299.484 | 0.8506  | 0.3489 |

---

$f(1, 1)$

---

|          |         |         |         |        |
|----------|---------|---------|---------|--------|
| 7.95518  | 400.139 | 310.442 | -0.0068 | 0.0526 |
| 7.95498  | 400.130 | 310.449 | -0.0035 | 0.0526 |
| 7.95510  | 400.137 | 310.436 | -0.0088 | 0.0526 |
| 6.01348  | 400.130 | 310.892 | -0.0013 | 0.0483 |
| 6.01361  | 400.134 | 310.895 | -0.0006 | 0.0483 |
| 6.01349  | 400.129 | 310.892 | -0.0009 | 0.0483 |
| 4.01874  | 400.131 | 312.174 | -0.0056 | 0.0448 |
| 4.01871  | 400.130 | 312.175 | -0.0053 | 0.0448 |
| 4.01865  | 400.128 | 312.163 | -0.0089 | 0.0448 |
| 4.01856  | 400.130 | 312.174 | -0.0055 | 0.0448 |
| 4.01853  | 400.130 | 312.165 | -0.0084 | 0.0448 |
| 4.01852  | 400.132 | 312.180 | -0.0040 | 0.0448 |
| 1.98826  | 400.130 | 314.302 | 0.0091  | 0.0427 |
| 1.98827  | 400.128 | 314.320 | 0.0150  | 0.0427 |
| 1.98828  | 400.127 | 314.297 | 0.0078  | 0.0427 |
| 0.501933 | 400.125 | 316.136 | -0.0259 | 0.0421 |
| 0.501939 | 400.132 | 316.142 | -0.0247 | 0.0422 |
| 0.501923 | 400.124 | 316.157 | -0.0192 | 0.0421 |

---

$f(0, 3)$

---

|         |         |         |         |        |
|---------|---------|---------|---------|--------|
| 7.95453 | 400.138 | 310.558 | 0.0305  | 0.0781 |
| 7.95441 | 400.131 | 310.439 | -0.0067 | 0.0531 |
| 7.95473 | 400.137 | 310.516 | 0.0171  | 0.1187 |
| 6.01314 | 400.131 | 310.992 | 0.0309  | 0.0487 |
| 6.01315 | 400.132 | 310.981 | 0.0271  | 0.0491 |
| 6.01308 | 400.129 | 310.966 | 0.0227  | 0.0528 |
| 4.01847 | 400.132 | 312.311 | 0.0381  | 0.0459 |
| 4.01843 | 400.129 | 312.303 | 0.0360  | 0.0447 |
| 4.01841 | 400.129 | 312.293 | 0.0327  | 0.0448 |
| 4.01828 | 400.129 | 312.291 | 0.0321  | 0.0461 |

|                 |                |                |                |               |
|-----------------|----------------|----------------|----------------|---------------|
| 4.01827         | 400.132        | 312.300        | 0.0346         | 0.0473        |
| 4.01824         | 400.131        | 312.308        | 0.0371         | 0.0495        |
| 1.98814         | 400.131        | 314.382        | 0.0344         | 0.0475        |
| 1.98815         | 400.127        | 314.377        | 0.0334         | 0.0784        |
| <i>1.98816</i>  | <i>400.128</i> | <i>314.321</i> | <i>0.0153</i>  | <i>0.0493</i> |
| <i>0.501904</i> | <i>400.126</i> | <i>320.747</i> | <i>1.4324</i>  | <i>0.0425</i> |
| <i>0.501906</i> | <i>400.131</i> | <i>320.752</i> | <i>1.4334</i>  | <i>0.0423</i> |
| <i>0.501891</i> | <i>400.124</i> | <i>320.764</i> | <i>1.4379</i>  | <i>0.0453</i> |
|                 |                | <i>f(0, 4)</i> |                |               |
| 7.95447         | 400.136        | 310.425        | -0.0118        | 0.0654        |
| 7.95443         | 400.132        | 310.437        | -0.0074        | 0.0740        |
| 7.95463         | 400.136        | 310.428        | -0.0109        | 0.0709        |
| 6.01315         | 400.133        | 310.944        | 0.0153         | 0.0485        |
| <i>6.01319</i>  | <i>400.131</i> | <i>310.936</i> | <i>0.0130</i>  | <i>0.0485</i> |
| 6.01309         | 400.130        | 310.942        | 0.0151         | 0.0488        |
| 4.01848         | 400.133        | 312.237        | 0.0140         | 0.0618        |
| 4.01840         | 400.128        | 312.226        | 0.0114         | 0.0560        |
| 4.01841         | 400.130        | 312.221        | 0.0093         | 0.0553        |
| 4.01826         | 400.128        | 312.274        | 0.0268         | 0.0941        |
| 4.01829         | 400.133        | 312.256        | 0.0202         | 0.0798        |
| 4.01824         | 400.129        | 312.269        | 0.0250         | 0.0906        |
| 1.98814         | 400.132        | 314.323        | 0.0155         | 0.0876        |
| 1.98814         | 400.126        | 314.319        | 0.0150         | 0.0677        |
| <i>1.98816</i>  | <i>400.129</i> | <i>314.269</i> | <i>-0.0013</i> | <i>0.0499</i> |
| <i>0.501905</i> | <i>400.127</i> | <i>319.080</i> | <i>0.9049</i>  | <i>0.0940</i> |
| <i>0.501904</i> | <i>400.131</i> | <i>319.054</i> | <i>0.8964</i>  | <i>0.1145</i> |
| <i>0.501891</i> | <i>400.124</i> | <i>319.091</i> | <i>0.9089</i>  | <i>0.0913</i> |
|                 |                | <i>f(1, 1)</i> |                |               |
| 8.00848         | 500.486        | 353.787        | -0.0058        | 0.0525        |
| 8.00828         | 500.483        | 353.783        | -0.0068        | 0.0525        |
| 8.00825         | 500.489        | 353.786        | -0.0064        | 0.0525        |
| 8.00788         | 500.489        | 353.784        | -0.0069        | 0.0525        |
| 8.00761         | 500.484        | 353.779        | -0.0077        | 0.0525        |
| 8.00768         | 500.486        | 353.784        | -0.0065        | 0.0525        |
| 6.00127         | 500.485        | 352.386        | -0.0131        | 0.0481        |
| 6.00117         | 500.481        | 352.393        | -0.0107        | 0.0481        |
| 6.00120         | 500.487        | 352.399        | -0.0096        | 0.0481        |
| 4.01038         | 500.483        | 351.496        | -0.0134        | 0.0446        |
| 4.01030         | 500.481        | 351.501        | -0.0115        | 0.0446        |
| 4.01035         | 500.485        | 351.511        | -0.0091        | 0.0446        |
| 4.01025         | 500.485        | 351.500        | -0.0123        | 0.0446        |
| 4.01019         | 500.480        | 351.502        | -0.0111        | 0.0446        |
| 4.01020         | 500.482        | 351.497        | -0.0128        | 0.0446        |

|                            |         |         |         |        |
|----------------------------|---------|---------|---------|--------|
| 2.00405                    | 500.483 | 351.025 | -0.0246 | 0.0424 |
| 2.00405                    | 500.478 | 351.024 | -0.0243 | 0.0424 |
| 2.00405                    | 500.483 | 351.032 | -0.0226 | 0.0424 |
| 0.501741                   | 500.484 | 350.995 | -0.0257 | 0.0420 |
| 0.501753                   | 500.479 | 351.000 | -0.0239 | 0.0421 |
| 0.501768                   | 500.478 | 350.962 | -0.0347 | 0.0421 |
| 0.501835                   | 500.481 | 351.007 | -0.0219 | 0.0421 |
| 0.501855                   | 500.480 | 351.033 | -0.0145 | 0.0421 |
| 0.501875                   | 500.478 | 350.989 | -0.0268 | 0.0421 |
| <hr/> <i>f(0, 3)</i> <hr/> |         |         |         |        |
| 8.00784                    | 500.485 | 353.828 | 0.0061  | 0.0567 |
| 8.00775                    | 500.484 | 353.818 | 0.0034  | 0.0541 |
| 8.00765                    | 500.489 | 353.806 | -0.0005 | 0.0526 |
| 8.00727                    | 500.488 | 353.827 | 0.0057  | 0.0526 |
| 8.00708                    | 500.484 | 353.808 | 0.0006  | 0.0535 |
| 8.00717                    | 500.487 | 353.911 | 0.0294  | 0.0535 |
| 6.00086                    | 500.484 | 352.567 | 0.0384  | 0.0548 |
| 6.00080                    | 500.481 | 352.528 | 0.0277  | 0.0497 |
| 6.00080                    | 500.487 | 352.536 | 0.0292  | 0.0725 |
| 4.01009                    | 500.482 | 351.588 | 0.0132  | 0.0600 |
| 4.01009                    | 500.481 | 351.645 | 0.0295  | 0.0470 |
| 4.01010                    | 500.485 | 351.646 | 0.0292  | 0.0472 |
| 4.01000                    | 500.484 | 351.636 | 0.0265  | 0.0447 |
| 4.00997                    | 500.480 | 351.642 | 0.0287  | 0.0447 |
| 4.00996                    | 500.483 | 351.679 | 0.0389  | 0.0447 |
| 2.00393                    | 500.482 | 351.136 | 0.0074  | 0.0621 |
| 2.00394                    | 500.478 | 351.174 | 0.0184  | 0.0456 |
| 2.00394                    | 500.484 | 351.210 | 0.0282  | 0.0427 |
| 0.501716                   | 500.484 | 356.101 | 1.4289  | 0.0422 |
| 0.501727                   | 500.479 | 356.104 | 1.4300  | 0.0422 |
| 0.501745                   | 500.479 | 356.095 | 1.4276  | 0.0425 |
| 0.501811                   | 500.482 | 356.128 | 1.4366  | 0.0420 |
| 0.501829                   | 500.479 | 356.136 | 1.4391  | 0.0421 |
| 0.501852                   | 500.478 | 356.139 | 1.4402  | 0.0420 |
| <hr/> <i>f(0, 4)</i> <hr/> |         |         |         |        |
| 8.00780                    | 500.484 | 353.866 | 0.0169  | 0.0525 |
| 8.00770                    | 500.485 | 353.874 | 0.0192  | 0.0531 |
| 8.00765                    | 500.488 | 353.856 | 0.0136  | 0.0526 |
| 8.00724                    | 500.487 | 353.861 | 0.0154  | 0.0526 |
| 8.00711                    | 500.484 | 353.878 | 0.0204  | 0.0530 |
| 8.00718                    | 500.488 | 353.866 | 0.0166  | 0.0530 |
| 6.00085                    | 500.483 | 352.505 | 0.0208  | 0.1010 |
| 6.00080                    | 500.482 | 352.459 | 0.0080  | 0.1275 |

|                 |                |                |               |               |
|-----------------|----------------|----------------|---------------|---------------|
| 6.00080         | 500.487        | 352.501        | 0.0195        | 0.1000        |
| 4.01008         | 500.481        | 351.618        | 0.0218        | 0.0458        |
| 4.01011         | 500.482        | 351.634        | 0.0264        | 0.0449        |
| 4.01009         | 500.485        | 351.641        | 0.0280        | 0.0460        |
| 4.00998         | 500.484        | 351.637        | 0.0269        | 0.0446        |
| 4.00992         | 500.479        | 351.629        | 0.0250        | 0.0449        |
| 4.00997         | 500.484        | 351.653        | 0.0313        | 0.0447        |
| 2.00393         | 500.481        | 351.223        | 0.0321        | 0.0438        |
| 2.00394         | 500.479        | 351.231        | 0.0346        | 0.0618        |
| 2.00394         | 500.484        | 351.247        | 0.0387        | 0.0441        |
| <i>0.501720</i> | <i>500.483</i> | <i>354.698</i> | <i>1.0291</i> | <i>0.0754</i> |
| <i>0.501730</i> | <i>500.478</i> | <i>354.671</i> | <i>1.0219</i> | <i>0.0922</i> |
| <i>0.501747</i> | <i>500.479</i> | <i>354.515</i> | <i>0.9775</i> | <i>0.0470</i> |
| <i>0.501815</i> | <i>500.482</i> | <i>354.567</i> | <i>0.9921</i> | <i>0.1025</i> |
| <i>0.501832</i> | <i>500.478</i> | <i>354.552</i> | <i>0.9880</i> | <i>0.1102</i> |
| <i>0.501856</i> | <i>500.479</i> | <i>354.565</i> | <i>0.9916</i> | <i>0.0887</i> |

---
